# Supplementary material for: Declined miR‐181a‐5p expression is associated with impaired natural killer cell development and function with aging
Source: PubMed Central journal article supplement (PMC8135006; doi:10.1111/acel.13353), 2021-03-29

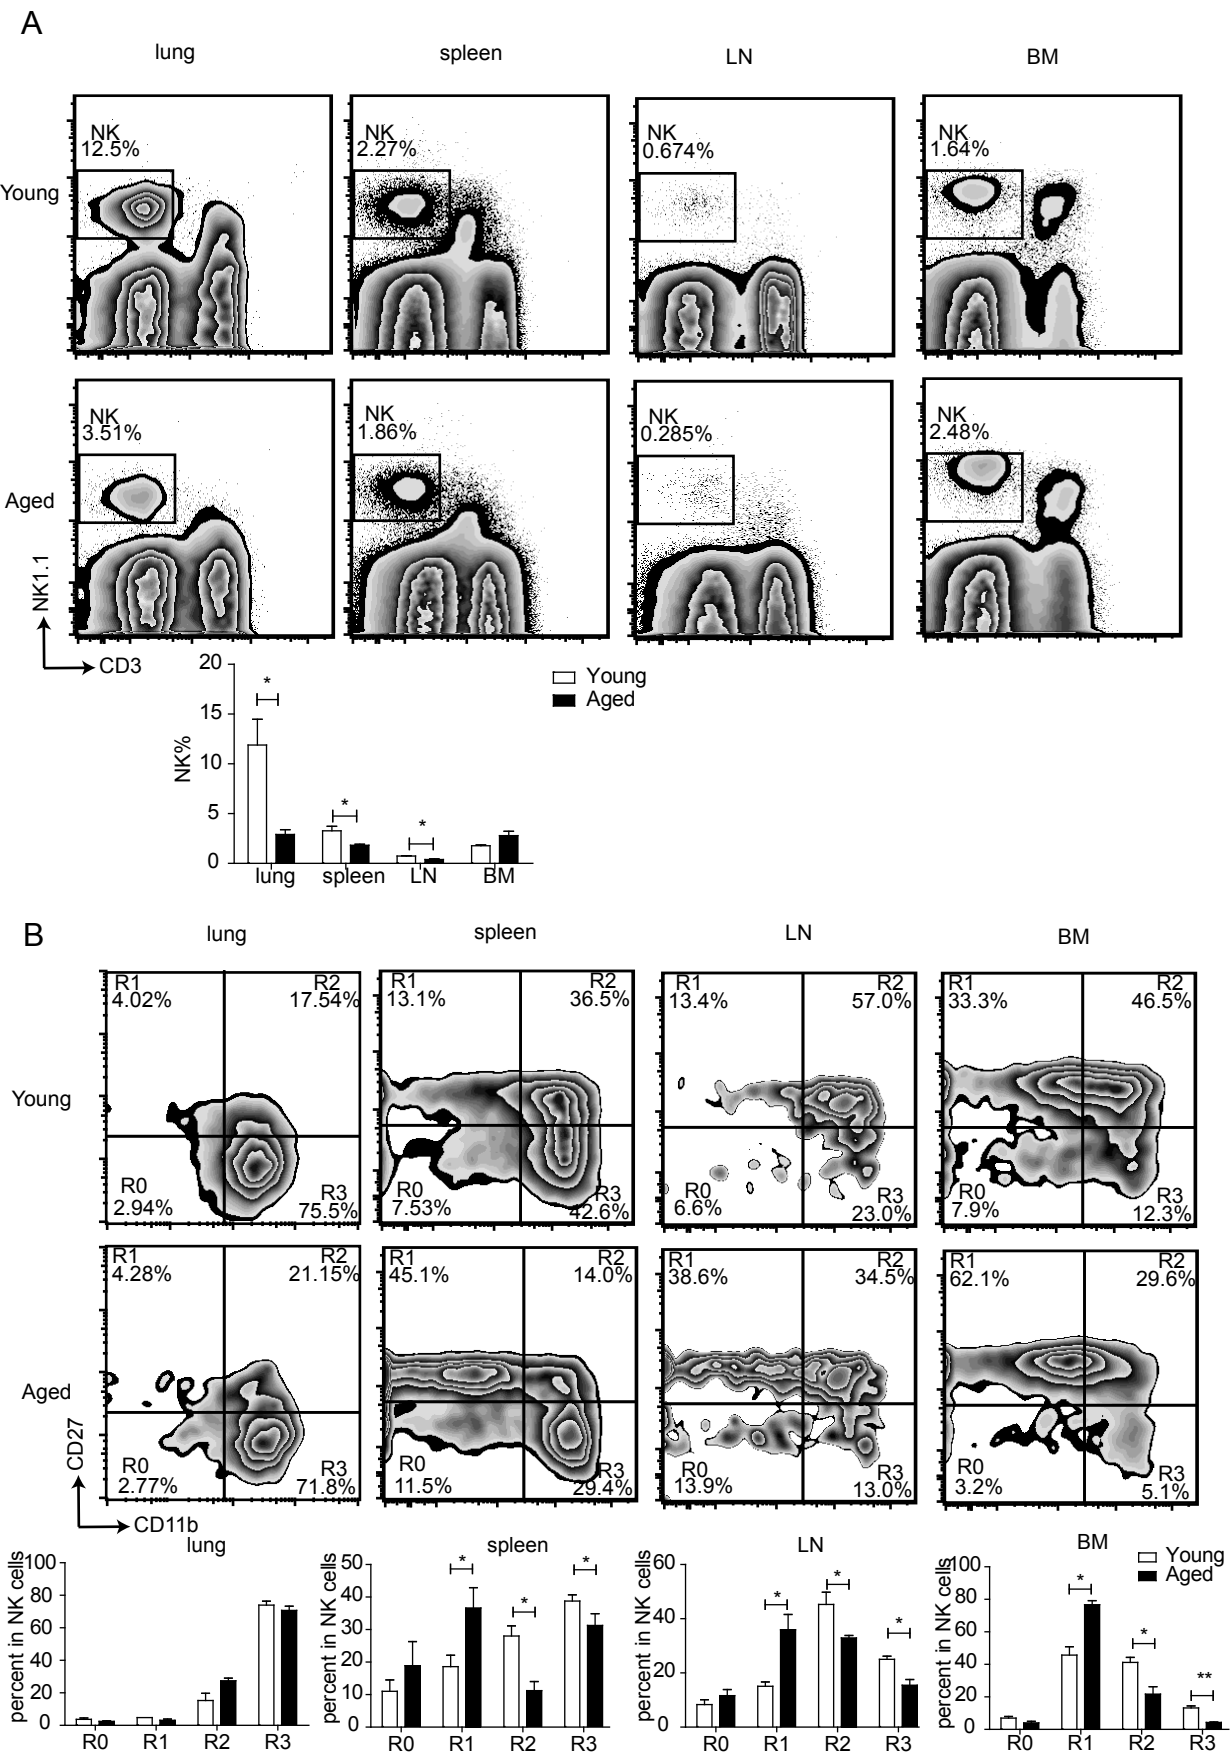

Supplement: ACEL-20-e13353-s001.pdf [file ACEL-20-e13353-s001.pdf]
